# Supplementary material
Source: HighWire-hosted journal article supplement (https://emj.bmj.com/content/40/11/768)
Supplement: inline-supplementary-material-1 [file inline-supplementary-material-1.pdf]

## Supplementary tables

Supplementary Table 1: Early warning scores and constituent variables

| Early Warning Score | Age | Temperature | Heart rate | Respiratory rate | Oxygen saturation | Conscious level | Blood pressure | Other                                                          |
|---------------------|-----|-------------|------------|------------------|-------------------|-----------------|----------------|----------------------------------------------------------------|
| NEWS2 [10]          |     | X           | X          | X                | X                 | X               | X              | Inspired oxygen                                                |
| qSOFA [11]          |     |             |            | X                |                   | X               | X              |                                                                |
| 90-30-90 [12]       |     |             |            | X                | X                 |                 | X              |                                                                |
| Borelli [13]        |     | X           | X          | X                | X                 | X               | X              | Suspected infection                                            |
| CIS [14]            | X   |             | X          | X                | X                 | X               | X              |                                                                |
| HEWS [15]           |     | X           | X          | X                | X                 | X               | X              | Inspired oxygen                                                |
| MEWS [16]           |     | X           | X          | X                |                   | X               | X              |                                                                |
| NHS pre-alert [17]  |     |             | X          | X                | X                 | X               | X              |                                                                |
| PHANTASi [18]       |     | X           | X          | X                |                   |                 |                |                                                                |
| PITSTOP [19]        |     | X           |            |                  |                   |                 | X              | Paramedic suspicion of infection                               |
| PreSAT [20]         |     | X           | X          | X                |                   |                 | X              |                                                                |
| PRESEP [21]         |     | X           | X          | X                | X                 |                 | X              |                                                                |
| PRESS [22]          | X   | X           |            |                  | X                 |                 | X              | Dispatch chief complaint of sick person; nursing home resident |
| PSP [23]            |     | X           | X          | X                |                   |                 | X              |                                                                |
| REMS [24]           | X   |             | X          | X                | X                 | X               | X              |                                                                |
| RST [25]            |     | X           | X          | X                |                   | X               |                | Blood glucose                                                  |
| Sepsis Alert [26]   |     | X           | X          | X                |                   |                 | X              | Suspected or documented infection, hypoperfusion               |
| SEPSIS [27]         | X   | X           | X          | X                | X                 | X               | X              | Skin appearance                                                |
| STSS [28]           | X   |             | X          | X                | X                 | X               | X              |                                                                |
| Suffoletto [29]     |     | X           |            |                  |                   |                 | X              |                                                                |
| UKST red flag* [3]  |     |             | X          | X                | X                 | X               | X              | Skin appearance                                                |

\*Excluding lactate, oliguria and recent chemotherapy

National Early Warning Score, version 2 (NEWS2); Quick Sequential Organ Failure Assessment (qSOFA); Critical illness score (CIS); Hamilton Early Warning Score (HEWS); Modified Early Warning Score (MEWS); Prehospital ANTibiotics Against Sepsis (PHANTASi); Paramedic Initiated Treatment of Sepsis Targeting Out-of-hospital Patients clinical trial (PITSTOP); Prehospital Sepsis Assessment Tool (PreSAT); Prehospital Early Sepsis Detection (PRESEP); Prehospital Severe Sepsis (PRESS); Prehospital Sepsis Project (PSP); Rapid Emergency Medicine Score (REMS); Robson Screening Tool (RST); Screening to Enhance Prehospital Identification of Sepsis (SEPSIS); Simple Triage Scoring System (STSS); United Kingdom Sepsis Trust (UKST)

Supplementary Table 2: Agreement between expert doctors during reference standard adjudication

| <b>Assessment</b>               | <b>Doctor 1</b> | <b>Doctor 2</b> | <b>Consensus</b> | <b>Kappa (95% CI)</b> |
|---------------------------------|-----------------|-----------------|------------------|-----------------------|
| Evidence of infection           | 86.0%           | 87.6%           | 84.7%            | 0.62 (0.53, 0.71)     |
| SOFA score 2+ worse than normal | 60.2%           | 61.1%           | 60.0%            | 0.87 (0.83, 0.91)     |
| Patient meets sepsis-3 criteria | 56.0%           | 55.0%           | 56.2%            | 0.89 (0.85, 0.92)     |
| Treatment for sepsis given      | 52.5%           | 51.5%           | 53.3%            | 0.87 (0.83, 0.91)     |

Supplementary Table 3: Accuracy of categorised diagnostic impression for the primary reference standard

| Threshold                                   | N     | TP  | FP   | FN  | TN    | Sensitivity                | Specificity                | PPV                        | NPV                        |
|---------------------------------------------|-------|-----|------|-----|-------|----------------------------|----------------------------|----------------------------|----------------------------|
| Sepsis                                      | 12870 | 114 | 286  | 234 | 12236 | 0.328<br>(0.28,<br>0.379)  | 0.977<br>(0.974,<br>0.98)  | 0.285<br>(0.243,<br>0.331) | 0.981<br>(0.979,<br>0.983) |
| Sepsis or infection                         | 12870 | 199 | 1080 | 149 | 11442 | 0.572<br>(0.519,<br>0.623) | 0.914<br>(0.909,<br>0.919) | 0.156<br>(0.137,<br>0.176) | 0.987<br>(0.985,<br>0.989) |
| Sepsis, infection or nonspecific impression | 12870 | 312 | 5576 | 36  | 6946  | 0.897<br>(0.86,<br>0.924)  | 0.555<br>(0.546,<br>0.563) | 0.053<br>(0.048,<br>0.059) | 0.995<br>(0.993,<br>0.996) |

Supplementary Table 4: Area under ROC curve for each early warning score for the primary reference standard

| Early warning score | Sepsis               | Sepsis or infection  | Sepsis, infection or nonspecific impression | All diagnostic impressions |
|---------------------|----------------------|----------------------|---------------------------------------------|----------------------------|
| NEWS2               | 0.655 (0.63, 0.68)   | 0.756 (0.729, 0.783) | 0.858 (0.836, 0.88)                         | 0.877 (0.86, 0.895)        |
| qSOFA               | 0.645 (0.62, 0.669)  | 0.734 (0.707, 0.761) | 0.809 (0.785, 0.834)                        | 0.801 (0.778, 0.824)       |
| 90-30-90            | 0.624 (0.601, 0.648) | 0.686 (0.66, 0.712)  | 0.743 (0.717, 0.769)                        | 0.742 (0.717, 0.768)       |
| Borelli             | 0.639 (0.615, 0.663) | 0.712 (0.686, 0.738) | 0.781 (0.755, 0.806)                        | 0.788 (0.764, 0.813)       |
| CIS                 | 0.654 (0.629, 0.679) | 0.755 (0.728, 0.782) | 0.845 (0.822, 0.867)                        | 0.838 (0.817, 0.859)       |
| HEWS                | 0.654 (0.629, 0.679) | 0.751 (0.724, 0.778) | 0.841 (0.818, 0.863)                        | 0.837 (0.816, 0.858)       |
| MEWS                | 0.654 (0.629, 0.679) | 0.753 (0.726, 0.78)  | 0.851 (0.828, 0.873)                        | 0.857 (0.837, 0.876)       |
| NHS pre-alert       | 0.624 (0.601, 0.648) | 0.696 (0.67, 0.722)  | 0.751 (0.725, 0.776)                        | 0.747 (0.723, 0.772)       |
| PHANTASi            | 0.626 (0.602, 0.649) | 0.708 (0.682, 0.735) | 0.745 (0.719, 0.771)                        | 0.741 (0.716, 0.767)       |
| PITSTOP             | 0.534 (0.52, 0.547)  | 0.545 (0.53, 0.56)   | 0.549 (0.533, 0.564)                        | 0.554 (0.537, 0.57)        |
| PreSAT              | 0.648 (0.624, 0.673) | 0.734 (0.708, 0.761) | 0.789 (0.766, 0.813)                        | 0.775 (0.754, 0.797)       |
| PRESEP              | 0.653 (0.628, 0.678) | 0.75 (0.723, 0.777)  | 0.847 (0.824, 0.87)                         | 0.856 (0.834, 0.878)       |
| PRESS               | 0.551 (0.534, 0.567) | 0.557 (0.54, 0.574)  | 0.579 (0.559, 0.599)                        | 0.587 (0.566, 0.608)       |
| PSP                 | 0.654 (0.629, 0.679) | 0.754 (0.728, 0.781) | 0.84 (0.818, 0.862)                         | 0.832 (0.811, 0.852)       |
| REMS                | 0.654 (0.629, 0.679) | 0.752 (0.725, 0.779) | 0.814 (0.792, 0.836)                        | 0.757 (0.732, 0.781)       |
| RST                 | 0.648 (0.623, 0.672) | 0.737 (0.711, 0.764) | 0.782 (0.761, 0.803)                        | 0.73 (0.712, 0.747)        |
| Sepsis alert        | 0.537 (0.523, 0.551) | 0.542 (0.528, 0.557) | 0.558 (0.541, 0.576)                        | 0.563 (0.545, 0.581)       |
| SEPSIS              | 0.654 (0.629, 0.679) | 0.755 (0.727, 0.782) | 0.862 (0.84, 0.884)                         | 0.882 (0.865, 0.899)       |
| STSS                | 0.652 (0.627, 0.677) | 0.749 (0.722, 0.776) | 0.837 (0.814, 0.861)                        | 0.831 (0.809, 0.854)       |
| Suffoletto          | 0.64 (0.616, 0.664)  | 0.728 (0.701, 0.754) | 0.799 (0.775, 0.823)                        | 0.801 (0.778, 0.824)       |
| UKST red flag       | 0.648 (0.623, 0.672) | 0.733 (0.707, 0.76)  | 0.788 (0.766, 0.809)                        | 0.756 (0.737, 0.775)       |

See supplementary table 1 for details of the early warning scores

National Early Warning Score, version 2 (NEWS2); Quick Sequential Organ Failure Assessment (qSOFA); Critical illness score (CIS); Hamilton Early Warning Score (HEWS); Modified Early Warning Score (MEWS); Prehospital ANTibiotics Against Sepsis (PHANTASi); Paramedic Initiated Treatment of Sepsis Targeting Out-of-hospital Patients clinical trial (PITSTOP); Prehospital Sepsis Assessment Tool (PreSAT); Prehospital Early Sepsis Detection (PRESEP); Prehospital Severe Sepsis (PRESS); Prehospital Sepsis Project (PSP); Rapid Emergency Medicine Score (REMS); Robson Screening Tool (RST); Screening to Enhance Prehospital Identification of Sepsis (SEPSIS); Simple Triage Scoring System (STSS); United Kingdom Sepsis Trust (UKST)

Supplementary Table 5: Accuracy of NEWS2 applied only to presentations with a diagnostic impression of sepsis

| Threshold | N     | TP  | FP  | FN  | TN    | Sensitivity          | Specificity          | PPV                  | NPV                  |
|-----------|-------|-----|-----|-----|-------|----------------------|----------------------|----------------------|----------------------|
| 0         | 12859 | 114 | 282 | 233 | 12230 | 0.329 (0.281, 0.38)  | 0.977 (0.975, 0.98)  | 0.288 (0.245, 0.334) | 0.981 (0.979, 0.984) |
| 1         | 12859 | 114 | 278 | 233 | 12234 | 0.329 (0.281, 0.38)  | 0.978 (0.975, 0.98)  | 0.291 (0.248, 0.338) | 0.981 (0.979, 0.984) |
| 2         | 12859 | 114 | 273 | 233 | 12239 | 0.329 (0.281, 0.38)  | 0.978 (0.975, 0.981) | 0.295 (0.251, 0.342) | 0.981 (0.979, 0.984) |
| 3         | 12859 | 113 | 262 | 234 | 12250 | 0.326 (0.278, 0.377) | 0.979 (0.976, 0.981) | 0.301 (0.257, 0.35)  | 0.981 (0.979, 0.983) |
| 4         | 12859 | 111 | 245 | 236 | 12267 | 0.32 (0.273, 0.371)  | 0.98 (0.978, 0.983)  | 0.312 (0.266, 0.362) | 0.981 (0.979, 0.983) |
| 5         | 12859 | 108 | 228 | 239 | 12284 | 0.311 (0.265, 0.362) | 0.982 (0.979, 0.984) | 0.321 (0.274, 0.373) | 0.981 (0.978, 0.983) |
| 6         | 12859 | 105 | 190 | 242 | 12322 | 0.303 (0.257, 0.353) | 0.985 (0.983, 0.987) | 0.356 (0.303, 0.412) | 0.981 (0.978, 0.983) |
| 7         | 12859 | 95  | 157 | 252 | 12355 | 0.274 (0.23, 0.323)  | 0.987 (0.985, 0.989) | 0.377 (0.319, 0.438) | 0.98 (0.977, 0.982)  |
| 8         | 12859 | 86  | 129 | 261 | 12383 | 0.248 (0.205, 0.296) | 0.99 (0.988, 0.991)  | 0.4 (0.337, 0.467)   | 0.979 (0.977, 0.982) |
| 9         | 12859 | 73  | 94  | 274 | 12418 | 0.21 (0.171, 0.256)  | 0.992 (0.991, 0.994) | 0.437 (0.364, 0.513) | 0.978 (0.976, 0.981) |
| 10        | 12859 | 59  | 65  | 288 | 12447 | 0.17 (0.134, 0.213)  | 0.995 (0.993, 0.996) | 0.476 (0.39, 0.563)  | 0.977 (0.975, 0.98)  |
| 11        | 12859 | 40  | 36  | 307 | 12476 | 0.115 (0.086, 0.153) | 0.997 (0.996, 0.998) | 0.526 (0.416, 0.635) | 0.976 (0.973, 0.978) |
| 12        | 12859 | 25  | 21  | 322 | 12491 | 0.072 (0.049, 0.104) | 0.998 (0.997, 0.999) | 0.543 (0.402, 0.678) | 0.975 (0.972, 0.977) |
| 13        | 12859 | 8   | 12  | 339 | 12500 | 0.023 (0.012, 0.045) | 0.999 (0.998, 0.999) | 0.4 (0.219, 0.613)   | 0.974 (0.971, 0.976) |
| 14        | 12859 | 4   | 7   | 343 | 12505 | 0.012 (0.004, 0.029) | 0.999 (0.999, 1)     | 0.364 (0.152, 0.646) | 0.973 (0.97, 0.976)  |
| 15        | 12859 | 0   | 3   | 347 | 12509 | 0 (0, 0.011)         | 1 (0.999, 1)         | 0 (0, 0.561)         | 0.973 (0.97, 0.976)  |
| 16        | 12859 | 0   | 0   | 347 | 12512 | 0 (0, 0.011)         | 1 (1, 1)             | -                    | 0.973 (0.97, 0.976)  |

Supplementary Table 6: Accuracy of qSOFA and other tools applied only to presentations with a diagnostic impression of sepsis

| EWS        | Threshold | N     | TP  | FP  | FN  | TN    | Sensitivity          | Specificity          | PPV                  | NPV                  |
|------------|-----------|-------|-----|-----|-----|-------|----------------------|----------------------|----------------------|----------------------|
| Pre-alert  | 0         | 12870 | 45  | 110 | 303 | 12412 | 0.129 (0.098, 0.169) | 0.991 (0.989, 0.993) | 0.29 (0.225, 0.366)  | 0.976 (0.973, 0.979) |
| qSOFA      | 0         | 12869 | 107 | 249 | 241 | 12272 | 0.307 (0.261, 0.358) | 0.98 (0.978, 0.982)  | 0.301 (0.255, 0.35)  | 0.981 (0.978, 0.983) |
| qSOFA      | 1         | 12869 | 72  | 103 | 276 | 12418 | 0.207 (0.168, 0.253) | 0.992 (0.99, 0.993)  | 0.411 (0.341, 0.485) | 0.978 (0.976, 0.981) |
| qSOFA      | 2         | 12869 | 19  | 21  | 329 | 12500 | 0.055 (0.035, 0.084) | 0.998 (0.997, 0.999) | 0.475 (0.329, 0.625) | 0.974 (0.971, 0.977) |
| 90-30-90   | 0         | 12857 | 91  | 169 | 256 | 12341 | 0.262 (0.219, 0.311) | 0.986 (0.984, 0.988) | 0.35 (0.295, 0.41)   | 0.98 (0.977, 0.982)  |
| Borelli    | 0         | 12835 | 102 | 203 | 245 | 12285 | 0.294 (0.248, 0.344) | 0.984 (0.981, 0.986) | 0.334 (0.284, 0.389) | 0.98 (0.978, 0.983)  |
| CIS        | 0         | 12855 | 114 | 283 | 233 | 12225 | 0.329 (0.281, 0.38)  | 0.977 (0.975, 0.98)  | 0.287 (0.245, 0.334) | 0.981 (0.979, 0.984) |
| CIS        | 4         | 12855 | 32  | 42  | 315 | 12466 | 0.092 (0.066, 0.127) | 0.997 (0.995, 0.998) | 0.432 (0.326, 0.546) | 0.975 (0.973, 0.978) |
| HEWS       | 4         | 12835 | 101 | 209 | 246 | 12279 | 0.291 (0.246, 0.341) | 0.983 (0.981, 0.985) | 0.326 (0.276, 0.38)  | 0.98 (0.978, 0.983)  |
| MEWS       | 4         | 12859 | 88  | 189 | 259 | 12323 | 0.254 (0.211, 0.302) | 0.985 (0.983, 0.987) | 0.318 (0.266, 0.375) | 0.979 (0.977, 0.982) |
| NHS        | 0         | 12855 | 92  | 204 | 255 | 12304 | 0.265 (0.221, 0.314) | 0.984 (0.981, 0.986) | 0.311 (0.261, 0.366) | 0.98 (0.977, 0.982)  |
| PHANTASi   | 0         | 12858 | 93  | 210 | 254 | 12301 | 0.268 (0.224, 0.317) | 0.983 (0.981, 0.985) | 0.307 (0.258, 0.361) | 0.98 (0.977, 0.982)  |
| PITSTOP    | 0         | 12813 | 24  | 20  | 322 | 12447 | 0.069 (0.047, 0.101) | 0.998 (0.998, 0.999) | 0.545 (0.401, 0.683) | 0.975 (0.972, 0.977) |
| PreSAT     | 0         | 12835 | 110 | 250 | 237 | 12238 | 0.317 (0.27, 0.368)  | 0.98 (0.977, 0.982)  | 0.306 (0.26, 0.355)  | 0.981 (0.978, 0.983) |
| PRESEP     | 3         | 12835 | 111 | 242 | 236 | 12246 | 0.32 (0.273, 0.371)  | 0.981 (0.978, 0.983) | 0.314 (0.268, 0.365) | 0.981 (0.979, 0.983) |
| PRESS      | 1         | 12835 | 35  | 33  | 312 | 12455 | 0.101 (0.073, 0.137) | 0.997 (0.996, 0.998) | 0.515 (0.398, 0.629) | 0.976 (0.973, 0.978) |
| PSP        | 1         | 12835 | 111 | 258 | 236 | 12230 | 0.32 (0.273, 0.371)  | 0.979 (0.977, 0.982) | 0.301 (0.256, 0.349) | 0.981 (0.979, 0.983) |
| REMS       | 2         | 12855 | 114 | 269 | 233 | 12239 | 0.329 (0.281, 0.38)  | 0.978 (0.976, 0.981) | 0.298 (0.254, 0.345) | 0.981 (0.979, 0.984) |
| RST        | 0         | 12857 | 110 | 264 | 237 | 12246 | 0.317 (0.27, 0.368)  | 0.979 (0.976, 0.981) | 0.294 (0.25, 0.342)  | 0.981 (0.978, 0.983) |
| SAS        | 0         | 12836 | 26  | 14  | 321 | 12475 | 0.075 (0.052, 0.108) | 0.999 (0.998, 0.999) | 0.65 (0.495, 0.779)  | 0.975 (0.972, 0.977) |
| SEPSIS     | 4         | 12856 | 78  | 123 | 269 | 12386 | 0.225 (0.184, 0.272) | 0.99 (0.988, 0.992)  | 0.388 (0.323, 0.457) | 0.979 (0.976, 0.981) |
| STSS       | 1         | 12855 | 104 | 211 | 243 | 12297 | 0.3 (0.254, 0.35)    | 0.983 (0.981, 0.985) | 0.33 (0.281, 0.384)  | 0.981 (0.978, 0.983) |
| Suffoletto | 0         | 12813 | 103 | 219 | 243 | 12248 | 0.298 (0.252, 0.348) | 0.982 (0.98, 0.985)  | 0.32 (0.271, 0.373)  | 0.981 (0.978, 0.983) |
| UK         | 0         | 12855 | 109 | 237 | 238 | 12271 | 0.314 (0.268, 0.365) | 0.981 (0.979, 0.983) | 0.315 (0.268, 0.366) | 0.981 (0.978, 0.983) |

Supplementary Table 7: Accuracy of NEWS2 applied only to presentations with a diagnostic impression of sepsis or infection

| Threshold | N     | TP  | FP   | FN  | TN    | Sensitivity          | Specificity          | PPV                  | NPV                  |
|-----------|-------|-----|------|-----|-------|----------------------|----------------------|----------------------|----------------------|
| 0         | 12859 | 198 | 1032 | 149 | 11480 | 0.571 (0.518, 0.622) | 0.918 (0.913, 0.922) | 0.161 (0.141, 0.183) | 0.987 (0.985, 0.989) |
| 1         | 12859 | 197 | 967  | 150 | 11545 | 0.568 (0.515, 0.619) | 0.923 (0.918, 0.927) | 0.169 (0.149, 0.192) | 0.987 (0.985, 0.989) |
| 2         | 12859 | 197 | 889  | 150 | 11623 | 0.568 (0.515, 0.619) | 0.929 (0.924, 0.933) | 0.181 (0.16, 0.205)  | 0.987 (0.985, 0.989) |
| 3         | 12859 | 191 | 776  | 156 | 11736 | 0.55 (0.498, 0.602)  | 0.938 (0.934, 0.942) | 0.198 (0.174, 0.224) | 0.987 (0.985, 0.989) |
| 4         | 12859 | 181 | 658  | 166 | 11854 | 0.522 (0.469, 0.574) | 0.947 (0.943, 0.951) | 0.216 (0.189, 0.245) | 0.986 (0.984, 0.988) |
| 5         | 12859 | 171 | 540  | 176 | 11972 | 0.493 (0.441, 0.545) | 0.957 (0.953, 0.96)  | 0.241 (0.211, 0.273) | 0.986 (0.983, 0.987) |
| 6         | 12859 | 155 | 410  | 192 | 12102 | 0.447 (0.395, 0.499) | 0.967 (0.964, 0.97)  | 0.274 (0.239, 0.313) | 0.984 (0.982, 0.986) |
| 7         | 12859 | 133 | 314  | 214 | 12198 | 0.383 (0.334, 0.435) | 0.975 (0.972, 0.978) | 0.298 (0.257, 0.342) | 0.983 (0.98, 0.985)  |
| 8         | 12859 | 109 | 218  | 238 | 12294 | 0.314 (0.268, 0.365) | 0.983 (0.98, 0.985)  | 0.333 (0.284, 0.386) | 0.981 (0.978, 0.983) |
| 9         | 12859 | 91  | 146  | 256 | 12366 | 0.262 (0.219, 0.311) | 0.988 (0.986, 0.99)  | 0.384 (0.324, 0.447) | 0.98 (0.977, 0.982)  |
| 10        | 12859 | 68  | 91   | 279 | 12421 | 0.196 (0.158, 0.241) | 0.993 (0.991, 0.994) | 0.428 (0.353, 0.505) | 0.978 (0.975, 0.98)  |
| 11        | 12859 | 47  | 48   | 300 | 12464 | 0.135 (0.103, 0.175) | 0.996 (0.995, 0.997) | 0.495 (0.396, 0.594) | 0.976 (0.974, 0.979) |
| 12        | 12859 | 29  | 28   | 318 | 12484 | 0.084 (0.059, 0.117) | 0.998 (0.997, 0.998) | 0.509 (0.383, 0.634) | 0.975 (0.972, 0.978) |
| 13        | 12859 | 11  | 17   | 336 | 12495 | 0.032 (0.018, 0.056) | 0.999 (0.998, 0.999) | 0.393 (0.236, 0.576) | 0.974 (0.971, 0.976) |
| 14        | 12859 | 5   | 8    | 342 | 12504 | 0.014 (0.006, 0.033) | 0.999 (0.999, 1)     | 0.385 (0.177, 0.645) | 0.973 (0.97, 0.976)  |
| 15        | 12859 | 0   | 3    | 347 | 12509 | 0 (0, 0.011)         | 1 (0.999, 1)         | 0 (0, 0.561)         | 0.973 (0.97, 0.976)  |
| 16        | 12859 | 0   | 0    | 347 | 12512 | 0 (0, 0.011)         | 1 (1, 1)             | -                    | 0.973 (0.97, 0.976)  |

Supplementary Table 8: Accuracy of qSOFA and other tools applied only to presentations with a diagnostic impression of sepsis or infection

| EWS        | Threshold | N     | TP  | FP   | FN  | TN    | Sensitivity          | Specificity          | PPV                  | NPV                  |
|------------|-----------|-------|-----|------|-----|-------|----------------------|----------------------|----------------------|----------------------|
| Pre-alert  | 0         | 12870 | 52  | 133  | 296 | 12389 | 0.149 (0.116, 0.191) | 0.989 (0.987, 0.991) | 0.281 (0.221, 0.35)  | 0.977 (0.974, 0.979) |
| qSOFA      | 0         | 12869 | 180 | 758  | 168 | 11763 | 0.517 (0.465, 0.569) | 0.939 (0.935, 0.944) | 0.192 (0.168, 0.218) | 0.986 (0.984, 0.988) |
| qSOFA      | 1         | 12869 | 106 | 192  | 242 | 12329 | 0.305 (0.259, 0.355) | 0.985 (0.982, 0.987) | 0.356 (0.304, 0.412) | 0.981 (0.978, 0.983) |
| qSOFA      | 2         | 12869 | 23  | 22   | 325 | 12499 | 0.066 (0.044, 0.097) | 0.998 (0.997, 0.999) | 0.511 (0.37, 0.65)   | 0.975 (0.972, 0.977) |
| 90-30-90   | 0         | 12857 | 140 | 387  | 207 | 12123 | 0.403 (0.353, 0.456) | 0.969 (0.966, 0.972) | 0.266 (0.23, 0.305)  | 0.983 (0.981, 0.985) |
| Borelli    | 0         | 12835 | 160 | 463  | 187 | 12025 | 0.461 (0.409, 0.514) | 0.963 (0.959, 0.966) | 0.257 (0.224, 0.293) | 0.985 (0.982, 0.987) |
| CIS        | 0         | 12855 | 198 | 1039 | 149 | 11469 | 0.571 (0.518, 0.622) | 0.917 (0.912, 0.922) | 0.16 (0.141, 0.182)  | 0.987 (0.985, 0.989) |
| CIS        | 4         | 12855 | 38  | 54   | 309 | 12454 | 0.11 (0.081, 0.147)  | 0.996 (0.994, 0.997) | 0.413 (0.318, 0.515) | 0.976 (0.973, 0.978) |
| HEWS       | 4         | 12835 | 154 | 477  | 193 | 12011 | 0.444 (0.392, 0.496) | 0.962 (0.958, 0.965) | 0.244 (0.212, 0.279) | 0.984 (0.982, 0.986) |
| MEWS       | 4         | 12859 | 135 | 412  | 212 | 12100 | 0.389 (0.339, 0.441) | 0.967 (0.964, 0.97)  | 0.247 (0.213, 0.285) | 0.983 (0.98, 0.985)  |
| NHS        | 0         | 12855 | 149 | 471  | 198 | 12037 | 0.429 (0.378, 0.482) | 0.962 (0.959, 0.966) | 0.24 (0.208, 0.275)  | 0.984 (0.981, 0.986) |
| PHANTASi   | 0         | 12858 | 161 | 588  | 186 | 11923 | 0.464 (0.412, 0.517) | 0.953 (0.949, 0.957) | 0.215 (0.187, 0.246) | 0.985 (0.982, 0.987) |
| PITSTOP    | 0         | 12813 | 32  | 28   | 314 | 12439 | 0.092 (0.066, 0.128) | 0.998 (0.997, 0.998) | 0.533 (0.409, 0.654) | 0.975 (0.973, 0.978) |
| PreSAT     | 0         | 12835 | 183 | 732  | 164 | 11756 | 0.527 (0.475, 0.579) | 0.941 (0.937, 0.945) | 0.2 (0.175, 0.227)   | 0.986 (0.984, 0.988) |
| PRESEP     | 3         | 12835 | 183 | 738  | 164 | 11750 | 0.527 (0.475, 0.579) | 0.941 (0.937, 0.945) | 0.199 (0.174, 0.226) | 0.986 (0.984, 0.988) |
| PRESS      | 1         | 12835 | 40  | 61   | 307 | 12427 | 0.115 (0.086, 0.153) | 0.995 (0.994, 0.996) | 0.396 (0.306, 0.494) | 0.976 (0.973, 0.978) |
| PSP        | 1         | 12835 | 188 | 723  | 159 | 11765 | 0.542 (0.489, 0.593) | 0.942 (0.938, 0.946) | 0.206 (0.181, 0.234) | 0.987 (0.984, 0.989) |
| REMS       | 2         | 12855 | 197 | 987  | 150 | 11521 | 0.568 (0.515, 0.619) | 0.921 (0.916, 0.926) | 0.166 (0.146, 0.189) | 0.987 (0.985, 0.989) |
| RST        | 0         | 12857 | 188 | 836  | 159 | 11674 | 0.542 (0.489, 0.593) | 0.933 (0.929, 0.937) | 0.184 (0.161, 0.208) | 0.987 (0.984, 0.988) |
| SAS        | 0         | 12836 | 30  | 22   | 317 | 12467 | 0.086 (0.061, 0.121) | 0.998 (0.997, 0.999) | 0.577 (0.442, 0.701) | 0.975 (0.972, 0.978) |
| SEPSIS     | 4         | 12856 | 107 | 216  | 240 | 12293 | 0.308 (0.262, 0.359) | 0.983 (0.98, 0.985)  | 0.331 (0.282, 0.384) | 0.981 (0.978, 0.983) |
| STSS       | 1         | 12855 | 174 | 607  | 173 | 11901 | 0.501 (0.449, 0.554) | 0.951 (0.948, 0.955) | 0.223 (0.195, 0.253) | 0.986 (0.983, 0.988) |
| Suffoletto | 0         | 12813 | 176 | 669  | 170 | 11798 | 0.509 (0.456, 0.561) | 0.946 (0.942, 0.95)  | 0.208 (0.182, 0.237) | 0.986 (0.984, 0.988) |
| UK         | 0         | 12855 | 181 | 686  | 166 | 11822 | 0.522 (0.469, 0.574) | 0.945 (0.941, 0.949) | 0.209 (0.183, 0.237) | 0.986 (0.984, 0.988) |



Supplementary Table 9: Accuracy of NEWS2 applied only to presentations with a diagnostic impression of sepsis, infection, or nonspecific presentation

| Threshold | N     | TP  | FP   | FN  | TN    | Sensitivity          | Specificity          | PPV                  | NPV                  |
|-----------|-------|-----|------|-----|-------|----------------------|----------------------|----------------------|----------------------|
| 0         | 12859 | 307 | 4638 | 40  | 7874  | 0.885 (0.847, 0.914) | 0.629 (0.621, 0.638) | 0.062 (0.056, 0.069) | 0.995 (0.993, 0.996) |
| 1         | 12859 | 302 | 3833 | 45  | 8679  | 0.87 (0.831, 0.902)  | 0.694 (0.686, 0.702) | 0.073 (0.065, 0.081) | 0.995 (0.993, 0.996) |
| 2         | 12859 | 297 | 3248 | 50  | 9264  | 0.856 (0.815, 0.889) | 0.74 (0.733, 0.748)  | 0.084 (0.075, 0.093) | 0.995 (0.993, 0.996) |
| 3         | 12859 | 287 | 2598 | 60  | 9914  | 0.827 (0.784, 0.863) | 0.792 (0.785, 0.799) | 0.099 (0.089, 0.111) | 0.994 (0.992, 0.995) |
| 4         | 12859 | 270 | 2048 | 77  | 10464 | 0.778 (0.731, 0.819) | 0.836 (0.83, 0.843)  | 0.116 (0.104, 0.13)  | 0.993 (0.991, 0.994) |
| 5         | 12859 | 252 | 1612 | 95  | 10900 | 0.726 (0.677, 0.77)  | 0.871 (0.865, 0.877) | 0.135 (0.12, 0.151)  | 0.991 (0.989, 0.993) |
| 6         | 12859 | 220 | 1152 | 127 | 11360 | 0.634 (0.582, 0.683) | 0.908 (0.903, 0.913) | 0.16 (0.142, 0.181)  | 0.989 (0.987, 0.991) |
| 7         | 12859 | 181 | 823  | 166 | 11689 | 0.522 (0.469, 0.574) | 0.934 (0.93, 0.938)  | 0.18 (0.158, 0.205)  | 0.986 (0.984, 0.988) |
| 8         | 12859 | 147 | 513  | 200 | 11999 | 0.424 (0.373, 0.476) | 0.959 (0.955, 0.962) | 0.223 (0.193, 0.256) | 0.984 (0.981, 0.986) |
| 9         | 12859 | 111 | 311  | 236 | 12201 | 0.32 (0.273, 0.371)  | 0.975 (0.972, 0.978) | 0.263 (0.223, 0.307) | 0.981 (0.978, 0.983) |
| 10        | 12859 | 82  | 181  | 265 | 12331 | 0.236 (0.195, 0.284) | 0.986 (0.983, 0.987) | 0.312 (0.259, 0.37)  | 0.979 (0.976, 0.981) |
| 11        | 12859 | 55  | 90   | 292 | 12422 | 0.159 (0.124, 0.201) | 0.993 (0.991, 0.994) | 0.379 (0.304, 0.46)  | 0.977 (0.974, 0.979) |
| 12        | 12859 | 34  | 47   | 313 | 12465 | 0.098 (0.071, 0.134) | 0.996 (0.995, 0.997) | 0.42 (0.318, 0.528)  | 0.976 (0.973, 0.978) |
| 13        | 12859 | 12  | 28   | 335 | 12484 | 0.035 (0.02, 0.059)  | 0.998 (0.997, 0.998) | 0.3 (0.181, 0.454)   | 0.974 (0.971, 0.976) |
| 14        | 12859 | 6   | 12   | 341 | 12500 | 0.017 (0.008, 0.037) | 0.999 (0.998, 0.999) | 0.333 (0.163, 0.563) | 0.973 (0.971, 0.976) |
| 15        | 12859 | 0   | 3    | 347 | 12509 | 0 (0, 0.011)         | 1 (0.999, 1)         | 0 (0, 0.561)         | 0.973 (0.97, 0.976)  |
| 16        | 12859 | 0   | 0    | 347 | 12512 | 0 (0, 0.011)         | 1 (1, 1)             | -                    | 0.973 (0.97, 0.976)  |

Supplementary Table 10: Accuracy of qSOFA and other tools applied only to presentations with a diagnostic impression of sepsis, infection, or nonspecific presentation

| EWS        | Threshold | N     | TP  | FP   | FN  | TN    | Sensitivity          | Specificity          | PPV                  | NPV                  |
|------------|-----------|-------|-----|------|-----|-------|----------------------|----------------------|----------------------|----------------------|
| Pre-alert  | 0         | 12870 | 71  | 313  | 277 | 12209 | 0.204 (0.165, 0.249) | 0.975 (0.972, 0.978) | 0.185 (0.149, 0.227) | 0.978 (0.975, 0.98)  |
| qSOFA      | 0         | 12869 | 274 | 2984 | 74  | 9537  | 0.787 (0.741, 0.827) | 0.762 (0.754, 0.769) | 0.084 (0.075, 0.094) | 0.992 (0.99, 0.994)  |
| qSOFA      | 1         | 12869 | 149 | 551  | 199 | 11970 | 0.428 (0.377, 0.481) | 0.956 (0.952, 0.959) | 0.213 (0.184, 0.245) | 0.984 (0.981, 0.986) |
| qSOFA      | 2         | 12869 | 32  | 45   | 316 | 12476 | 0.092 (0.066, 0.127) | 0.996 (0.995, 0.997) | 0.416 (0.312, 0.527) | 0.975 (0.972, 0.978) |
| 90-30-90   | 0         | 12857 | 209 | 1463 | 138 | 11047 | 0.602 (0.55, 0.652)  | 0.883 (0.877, 0.889) | 0.125 (0.11, 0.142)  | 0.988 (0.985, 0.99)  |
| Borelli    | 0         | 12835 | 227 | 1160 | 120 | 11328 | 0.654 (0.603, 0.702) | 0.907 (0.902, 0.912) | 0.164 (0.145, 0.184) | 0.99 (0.987, 0.991)  |
| CIS        | 0         | 12855 | 310 | 5150 | 37  | 7358  | 0.893 (0.856, 0.922) | 0.588 (0.58, 0.597)  | 0.057 (0.051, 0.063) | 0.995 (0.993, 0.996) |
| CIS        | 4         | 12855 | 51  | 136  | 296 | 12372 | 0.147 (0.114, 0.188) | 0.989 (0.987, 0.991) | 0.273 (0.214, 0.341) | 0.977 (0.974, 0.979) |
| HEWS       | 4         | 12835 | 219 | 1381 | 128 | 11107 | 0.631 (0.579, 0.68)  | 0.889 (0.884, 0.895) | 0.137 (0.121, 0.155) | 0.989 (0.986, 0.99)  |
| MEWS       | 4         | 12859 | 177 | 909  | 170 | 11603 | 0.51 (0.458, 0.562)  | 0.927 (0.923, 0.932) | 0.163 (0.142, 0.186) | 0.986 (0.983, 0.988) |
| NHS        | 0         | 12855 | 221 | 1696 | 126 | 10812 | 0.637 (0.585, 0.686) | 0.864 (0.858, 0.87)  | 0.115 (0.102, 0.13)  | 0.988 (0.986, 0.99)  |
| PHANTASi   | 0         | 12858 | 204 | 1221 | 143 | 11290 | 0.588 (0.535, 0.638) | 0.902 (0.897, 0.907) | 0.143 (0.126, 0.162) | 0.987 (0.985, 0.989) |
| PITSTOP    | 0         | 12813 | 35  | 51   | 311 | 12416 | 0.101 (0.074, 0.137) | 0.996 (0.995, 0.997) | 0.407 (0.309, 0.513) | 0.976 (0.973, 0.978) |
| PreSAT     | 0         | 12835 | 258 | 2060 | 89  | 10428 | 0.744 (0.695, 0.787) | 0.835 (0.828, 0.841) | 0.111 (0.099, 0.125) | 0.992 (0.99, 0.993)  |
| PRESEP     | 3         | 12835 | 255 | 1736 | 92  | 10752 | 0.735 (0.686, 0.779) | 0.861 (0.855, 0.867) | 0.128 (0.114, 0.143) | 0.992 (0.99, 0.993)  |
| PRESS      | 1         | 12835 | 58  | 163  | 289 | 12325 | 0.167 (0.132, 0.21)  | 0.987 (0.985, 0.989) | 0.262 (0.209, 0.324) | 0.977 (0.974, 0.98)  |
| PSP        | 1         | 12835 | 268 | 2429 | 79  | 10059 | 0.772 (0.725, 0.813) | 0.805 (0.798, 0.812) | 0.099 (0.089, 0.111) | 0.992 (0.99, 0.994)  |
| REMS       | 2         | 12855 | 309 | 4919 | 38  | 7589  | 0.89 (0.853, 0.919)  | 0.607 (0.598, 0.615) | 0.059 (0.053, 0.066) | 0.995 (0.993, 0.996) |
| RST        | 0         | 12857 | 279 | 3008 | 68  | 9502  | 0.804 (0.759, 0.842) | 0.76 (0.752, 0.767)  | 0.085 (0.076, 0.095) | 0.993 (0.991, 0.994) |
| SAS        | 0         | 12836 | 42  | 52   | 305 | 12437 | 0.121 (0.091, 0.16)  | 0.996 (0.995, 0.997) | 0.447 (0.35, 0.547)  | 0.976 (0.973, 0.979) |
| SEPSIS     | 4         | 12856 | 137 | 427  | 210 | 12082 | 0.395 (0.345, 0.447) | 0.966 (0.963, 0.969) | 0.243 (0.209, 0.28)  | 0.983 (0.98, 0.985)  |
| STSS       | 1         | 12855 | 262 | 2226 | 85  | 10282 | 0.755 (0.707, 0.797) | 0.822 (0.815, 0.829) | 0.105 (0.094, 0.118) | 0.992 (0.99, 0.993)  |
| Suffoletto | 0         | 12813 | 247 | 1451 | 99  | 11016 | 0.714 (0.664, 0.759) | 0.884 (0.878, 0.889) | 0.145 (0.129, 0.163) | 0.991 (0.989, 0.993) |
| UK         | 0         | 12855 | 275 | 2720 | 72  | 9788  | 0.793 (0.747, 0.832) | 0.783 (0.775, 0.79)  | 0.092 (0.082, 0.103) | 0.993 (0.991, 0.994) |

Supplementary Table 11: Accuracy of NEWS2 applied to all presentations

| Threshold | N     | TP  | FP   | FN  | TN    | Sensitivity          | Specificity          | PPV                  | NPV                  |
|-----------|-------|-----|------|-----|-------|----------------------|----------------------|----------------------|----------------------|
| 0         | 12859 | 342 | 9189 | 5   | 3323  | 0.986 (0.967, 0.994) | 0.266 (0.258, 0.273) | 0.036 (0.032, 0.04)  | 0.998 (0.996, 0.999) |
| 1         | 12859 | 332 | 6749 | 15  | 5763  | 0.957 (0.93, 0.974)  | 0.461 (0.452, 0.469) | 0.047 (0.042, 0.052) | 0.997 (0.996, 0.998) |
| 2         | 12859 | 326 | 5210 | 21  | 7302  | 0.939 (0.909, 0.96)  | 0.584 (0.575, 0.592) | 0.059 (0.053, 0.065) | 0.997 (0.996, 0.998) |
| 3         | 12859 | 312 | 3801 | 35  | 8711  | 0.899 (0.863, 0.927) | 0.696 (0.688, 0.704) | 0.076 (0.068, 0.084) | 0.996 (0.994, 0.997) |
| 4         | 12859 | 290 | 2792 | 57  | 9720  | 0.836 (0.793, 0.871) | 0.777 (0.769, 0.784) | 0.094 (0.084, 0.105) | 0.994 (0.992, 0.995) |
| 5         | 12859 | 271 | 2088 | 76  | 10424 | 0.781 (0.735, 0.821) | 0.833 (0.826, 0.84)  | 0.115 (0.103, 0.128) | 0.993 (0.991, 0.994) |
| 6         | 12859 | 235 | 1460 | 112 | 11052 | 0.677 (0.626, 0.724) | 0.883 (0.878, 0.889) | 0.139 (0.123, 0.156) | 0.99 (0.988, 0.992)  |
| 7         | 12859 | 196 | 1018 | 151 | 11494 | 0.565 (0.512, 0.616) | 0.919 (0.914, 0.923) | 0.161 (0.142, 0.183) | 0.987 (0.985, 0.989) |
| 8         | 12859 | 155 | 616  | 192 | 11896 | 0.447 (0.395, 0.499) | 0.951 (0.947, 0.954) | 0.201 (0.174, 0.231) | 0.984 (0.982, 0.986) |
| 9         | 12859 | 117 | 364  | 230 | 12148 | 0.337 (0.289, 0.388) | 0.971 (0.968, 0.974) | 0.243 (0.207, 0.284) | 0.981 (0.979, 0.984) |
| 10        | 12859 | 86  | 214  | 261 | 12298 | 0.248 (0.205, 0.296) | 0.983 (0.98, 0.985)  | 0.287 (0.238, 0.34)  | 0.979 (0.977, 0.982) |
| 11        | 12859 | 57  | 110  | 290 | 12402 | 0.164 (0.129, 0.207) | 0.991 (0.989, 0.993) | 0.341 (0.274, 0.416) | 0.977 (0.974, 0.98)  |
| 12        | 12859 | 36  | 57   | 311 | 12455 | 0.104 (0.076, 0.14)  | 0.995 (0.994, 0.996) | 0.387 (0.294, 0.489) | 0.976 (0.973, 0.978) |
| 13        | 12859 | 13  | 35   | 334 | 12477 | 0.037 (0.022, 0.063) | 0.997 (0.996, 0.998) | 0.271 (0.166, 0.41)  | 0.974 (0.971, 0.977) |
| 14        | 12859 | 6   | 15   | 341 | 12497 | 0.017 (0.008, 0.037) | 0.999 (0.998, 0.999) | 0.286 (0.138, 0.5)   | 0.973 (0.971, 0.976) |
| 15        | 12859 | 0   | 4    | 347 | 12508 | 0 (0, 0.011)         | 1 (0.999, 1)         | 0 (0, 0.49)          | 0.973 (0.97, 0.976)  |
| 16        | 12859 | 0   | 1    | 347 | 12511 | 0 (0, 0.011)         | 1 (1, 1)             | 0 (0, 0.793)         | 0.973 (0.97, 0.976)  |

Supplementary Table 12: Accuracy of qSOFA and other tools applied to all presentations

| EWS        | Threshold | N     | TP  | FP    | FN  | TN    | Sensitivity          | Specificity          | PPV                  | NPV                  |
|------------|-----------|-------|-----|-------|-----|-------|----------------------|----------------------|----------------------|----------------------|
| Pre-alert  | 0         | 12870 | 80  | 531   | 268 | 11991 | 0.23 (0.189, 0.277)  | 0.958 (0.954, 0.961) | 0.131 (0.106, 0.16)  | 0.978 (0.975, 0.981) |
| qSOFA      | 0         | 12869 | 301 | 4908  | 47  | 7613  | 0.865 (0.825, 0.897) | 0.608 (0.599, 0.617) | 0.058 (0.052, 0.064) | 0.994 (0.992, 0.995) |
| qSOFA      | 1         | 12869 | 160 | 790   | 188 | 11731 | 0.46 (0.408, 0.512)  | 0.937 (0.933, 0.941) | 0.168 (0.146, 0.194) | 0.984 (0.982, 0.986) |
| qSOFA      | 2         | 12869 | 33  | 65    | 315 | 12456 | 0.095 (0.068, 0.13)  | 0.995 (0.993, 0.996) | 0.337 (0.251, 0.435) | 0.975 (0.972, 0.978) |
| 90-30-90   | 0         | 12857 | 222 | 1937  | 125 | 10573 | 0.64 (0.588, 0.688)  | 0.845 (0.839, 0.851) | 0.103 (0.091, 0.116) | 0.988 (0.986, 0.99)  |
| Borelli    | 0         | 12835 | 242 | 1505  | 105 | 10983 | 0.697 (0.647, 0.743) | 0.879 (0.874, 0.885) | 0.139 (0.123, 0.156) | 0.991 (0.989, 0.992) |
| CIS        | 0         | 12855 | 344 | 10864 | 3   | 1644  | 0.991 (0.975, 0.997) | 0.131 (0.126, 0.137) | 0.031 (0.028, 0.034) | 0.998 (0.995, 0.999) |
| CIS        | 4         | 12855 | 57  | 171   | 290 | 12337 | 0.164 (0.129, 0.207) | 0.986 (0.984, 0.988) | 0.25 (0.198, 0.31)   | 0.977 (0.974, 0.98)  |
| HEWS       | 4         | 12835 | 235 | 1923  | 112 | 10565 | 0.677 (0.626, 0.724) | 0.846 (0.84, 0.852)  | 0.109 (0.096, 0.123) | 0.99 (0.987, 0.991)  |
| MEWS       | 4         | 12859 | 190 | 1232  | 157 | 11280 | 0.548 (0.495, 0.599) | 0.902 (0.896, 0.907) | 0.134 (0.117, 0.152) | 0.986 (0.984, 0.988) |
| NHS        | 0         | 12855 | 241 | 2500  | 106 | 10008 | 0.695 (0.644, 0.741) | 0.8 (0.793, 0.807)   | 0.088 (0.078, 0.099) | 0.99 (0.987, 0.991)  |
| PHANTASi   | 0         | 12858 | 215 | 1710  | 132 | 10801 | 0.62 (0.567, 0.669)  | 0.863 (0.857, 0.869) | 0.112 (0.098, 0.127) | 0.988 (0.986, 0.99)  |
| PITSTOP    | 0         | 12813 | 39  | 67    | 307 | 12400 | 0.113 (0.084, 0.15)  | 0.995 (0.993, 0.996) | 0.368 (0.282, 0.463) | 0.976 (0.973, 0.978) |
| PreSAT     | 0         | 12835 | 277 | 3099  | 70  | 9389  | 0.798 (0.753, 0.837) | 0.752 (0.744, 0.759) | 0.082 (0.073, 0.092) | 0.993 (0.991, 0.994) |
| PRESEP     | 3         | 12835 | 270 | 2272  | 77  | 10216 | 0.778 (0.731, 0.819) | 0.818 (0.811, 0.825) | 0.106 (0.095, 0.119) | 0.993 (0.991, 0.994) |
| PRESS      | 1         | 12835 | 65  | 212   | 282 | 12276 | 0.187 (0.15, 0.232)  | 0.983 (0.981, 0.985) | 0.235 (0.189, 0.288) | 0.978 (0.975, 0.98)  |
| PSP        | 1         | 12835 | 292 | 4418  | 55  | 8070  | 0.841 (0.799, 0.876) | 0.646 (0.638, 0.655) | 0.062 (0.055, 0.069) | 0.993 (0.991, 0.995) |
| REMS       | 2         | 12855 | 343 | 10288 | 4   | 2220  | 0.988 (0.971, 0.996) | 0.177 (0.171, 0.184) | 0.032 (0.029, 0.036) | 0.998 (0.995, 0.999) |
| RST        | 0         | 12857 | 304 | 5217  | 43  | 7293  | 0.876 (0.837, 0.907) | 0.583 (0.574, 0.592) | 0.055 (0.049, 0.061) | 0.994 (0.992, 0.996) |
| SAS        | 0         | 12836 | 46  | 78    | 301 | 12411 | 0.133 (0.101, 0.172) | 0.994 (0.992, 0.995) | 0.371 (0.291, 0.459) | 0.976 (0.974, 0.979) |
| SEPSIS     | 4         | 12856 | 143 | 490   | 204 | 12019 | 0.412 (0.362, 0.465) | 0.961 (0.957, 0.964) | 0.226 (0.195, 0.26)  | 0.983 (0.981, 0.985) |
| STSS       | 1         | 12855 | 282 | 3326  | 65  | 9182  | 0.813 (0.768, 0.85)  | 0.734 (0.726, 0.742) | 0.078 (0.07, 0.087)  | 0.993 (0.991, 0.994) |
| Suffoletto | 0         | 12813 | 263 | 1969  | 83  | 10498 | 0.76 (0.712, 0.802)  | 0.842 (0.836, 0.848) | 0.118 (0.105, 0.132) | 0.992 (0.99, 0.994)  |
| UK         | 0         | 12855 | 297 | 4291  | 50  | 8217  | 0.856 (0.815, 0.889) | 0.657 (0.649, 0.665) | 0.065 (0.058, 0.072) | 0.994 (0.992, 0.995) |
